# Supplementary material
Source: publisher site journal article supplement (https://www.spandidos-publications.com/8174/downloadSupplementary)
Supplement: Supplementary file 1 [file downloadSupplementary]

**Table SI.** Comparison of demographic and insulin/IGF signaling-related variables between participants with (n=17) and without (n=15) coenzyme Q10 use.

| Parameter              | SCA3 with Q10       | SCA3 without Q10    | P-value |
|------------------------|---------------------|---------------------|---------|
| Demographics           |                     |                     |         |
| Male sex               | 10 (58.5)           | 10 (66.7)           | 0.647   |
| Age, years             | 49.0 (41.5-55.0)    | 47.0 (33.0-55.0)    | 0.521   |
| BMI, kg/m <sup>2</sup> | 22.7 (21.0-25.7)    | 21.2 (18.4-25.1)    | 0.141   |
| Age at onset, years    | 43.0 (29.5-49.0)    | 34.0 (29.0-38.0)    | 0.308   |
| Duration, years        | 8.0 (5.5-11.5)      | 10.0 (3.0-18.0)     | 0.909   |
| CAG repeat number      | 71.0 (68.5-74.5)    | 72.0 (70.0-74.0)    | 0.985   |
| SARA                   | 14.0 (9.8-21.0)     | 15.5 (5.0-21.5)     | 0.910   |
| NfL, pg/ml             | 28.3 (24.0-34.7)    | 20.8 (18.0-32.8)    | 0.355   |
| Insulin/IGF1 system    |                     |                     |         |
| IGF1, ng/ml            | 85.6 (64.7-111.1)   | 9836 (80.0-110.0)   | 0.396   |
| IGF2, ng/ml            | 365.7 (316.2-403.3) | 366.7 (305.4-390.4) | 0.664   |
| IGFBP1, pg/ml          | 315.3 (19.9-805.1)  | 208.9 (84.3-451.0)  | 0.970   |
| IGFBP3, ng/ml          | 41.2 (35.8-69.2)    | 43.6 (38.1-52.1)    | 0.925   |
| IGF1/IGFBP3 ratio      | 1.7 (1.3-2.4)       | 2.1 (1.4-3.2)       | 0.355   |
| Glucose, mg/dl         | 101.3 (85.1-130.2)  | 90.6 (81.2-101.6)   | 0.146   |
| Insulin, $\mu$ IU/ml   | 6.2 (3.0-11.8)      | 6.0 (2.1-10.5)      | 0.720   |
| G/I ratio              | 14.6 (9.7-36.6)     | 19.1 (8.4-32.1)     | 0.895   |

<sup>a</sup>P<0.05. All data are presented as median (interquartile range), with the exception of sex which is n (%). Sex was analyzed using the Fisher's exact test; all other continuous variables were analyzed using the Mann-Whitney U test. IGF1, insulin-like growth factor 1; BMI, body mass index; SARA, scale for the assessment and rating of ataxia; NfL, neurofilament light chain; IGFBP, insulin-like growth factor binding protein.

**Table SII.** AUC values of IIS components for differentiating early versus advanced spinocerebellar ataxia type 3 stages.

| <b>IIS component</b> | <b>AUC (95%CI)</b>  | <b>P-value</b>     |
|----------------------|---------------------|--------------------|
| IGFBP1               | 0.829 (0.646-1.000) | 0.003 <sup>a</sup> |
| Insulin              | 0.494 (0.293-0.694) | 0.953              |
| IGF1                 | 0.541 (0.302-0.780) | 0.706              |
| IGF1/IGFBP3 ratio    | 0.528 (0.301-0.755) | 0.796              |
| IGF2                 | 0.385 (0.157-0.613) | 0.293              |

<sup>a</sup>P<0.05. All data are presented as median (interquartile range). AUC and 95% CI were estimated using the DeLong non-parametric method within ROC analysis to evaluate the predictive performance of IIS components. IIS, insulin/insulin-like growth factor signaling; IGF1, insulin-like growth factor 1; IGFBP; IGF binding protein; AUC, area under the curve; CI, confidence interval.
